# Supplementary material
Source: publisher site journal article supplement (https://www.dovepress.com/article/149458)

## Supplementary materials

**Scheme S1** Chemical synthesis of the GM-HA-SH.

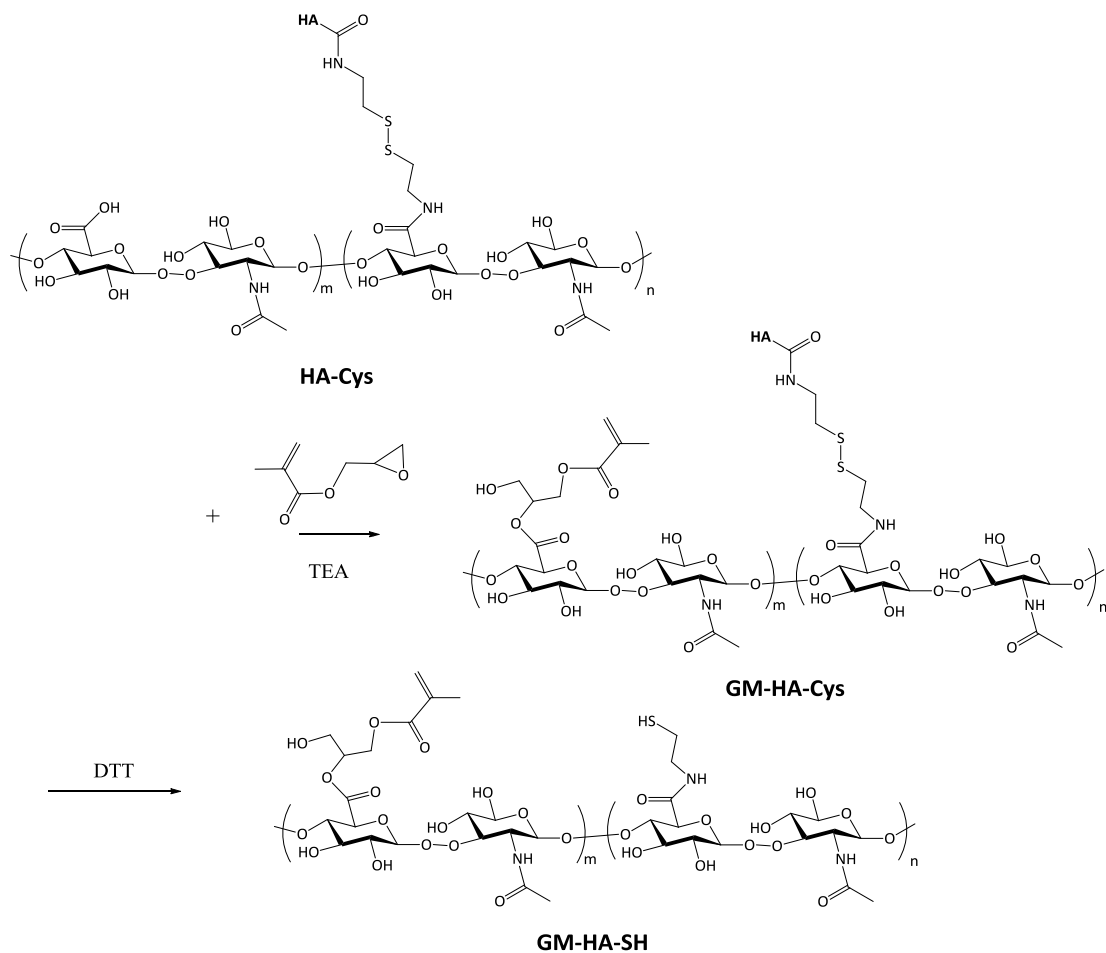

**Scheme S2** Synthesis of the aminated FA.

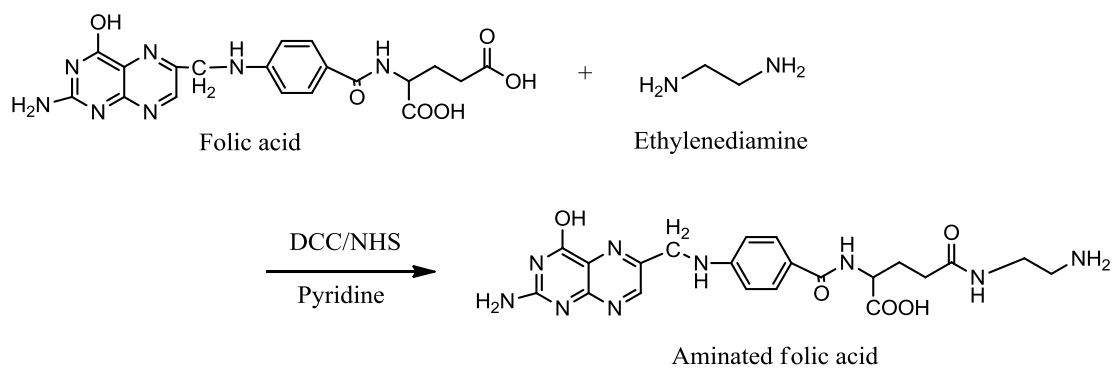

**Figure S1**  $^1\text{H}$  NMR spectrum of HA-Cys. \* The symbols present corresponding chemical shifts of (a) acetamido of HA, (b) methylene ( $-\text{S}-\text{S}-\text{CH}_2-\text{CH}_2-$ ) and (c) ( $-\text{S}-\text{S}-\text{CH}_2-\text{CH}_2-$ ) of cyctamine of component.

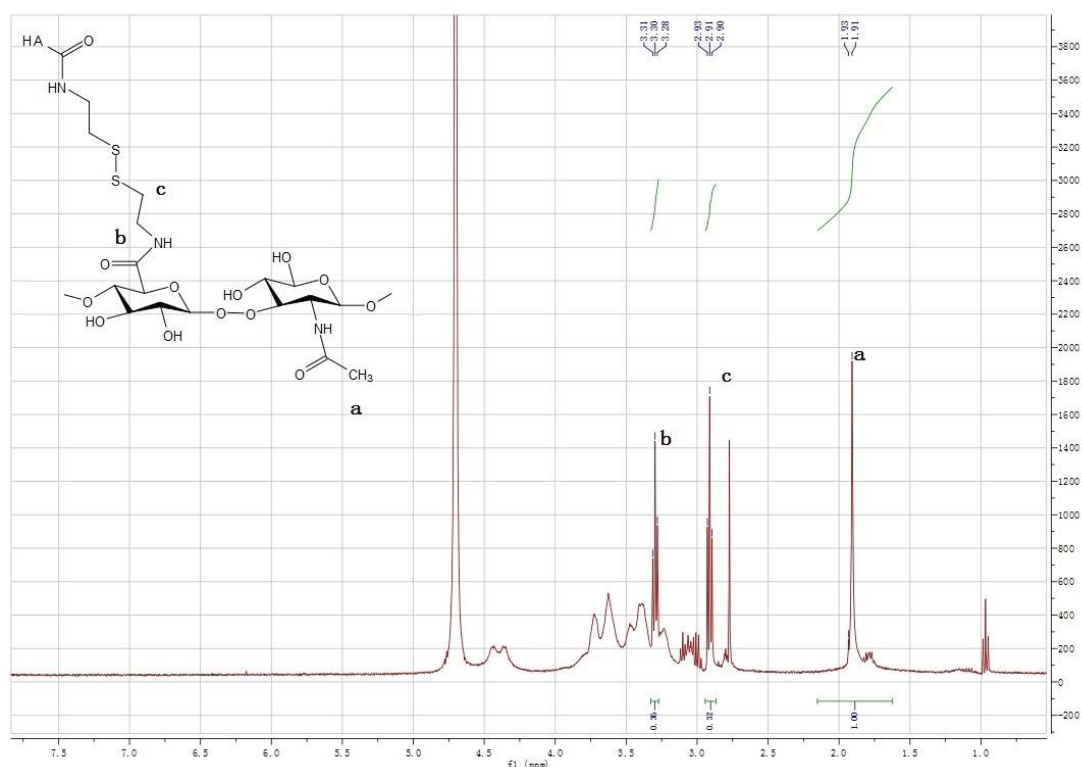

**Figure S2**  $^1\text{H}$  NMR spectrum of GM-HA-SH. \* Expanded view indicated the appearance of small peaks in (b), indicative of the presence of GM.

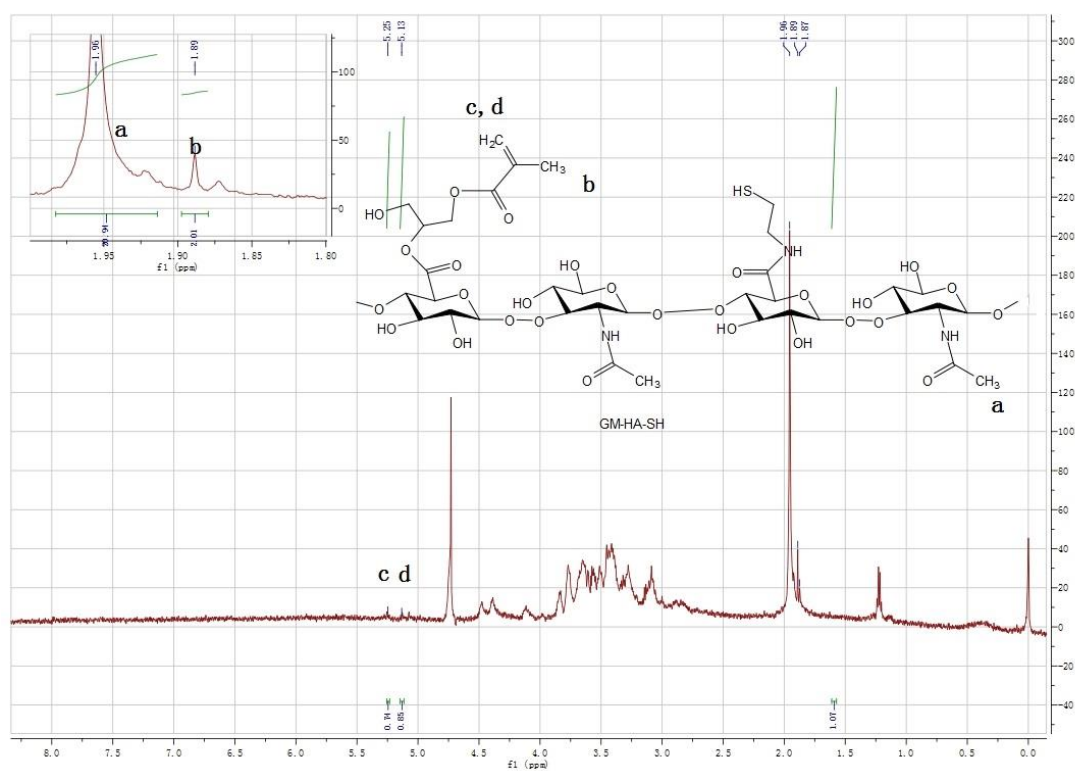

**Figure S3**  $^1\text{H}$  NMR spectrum of Z-HA-SH.

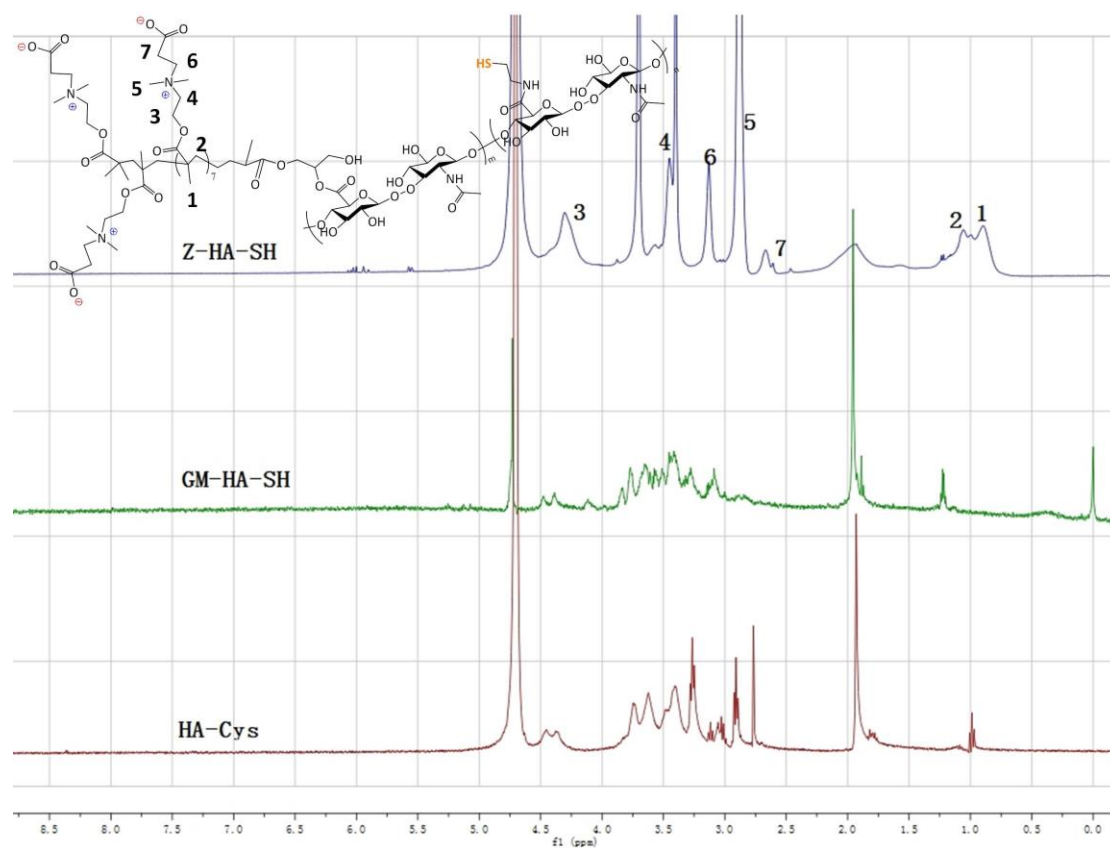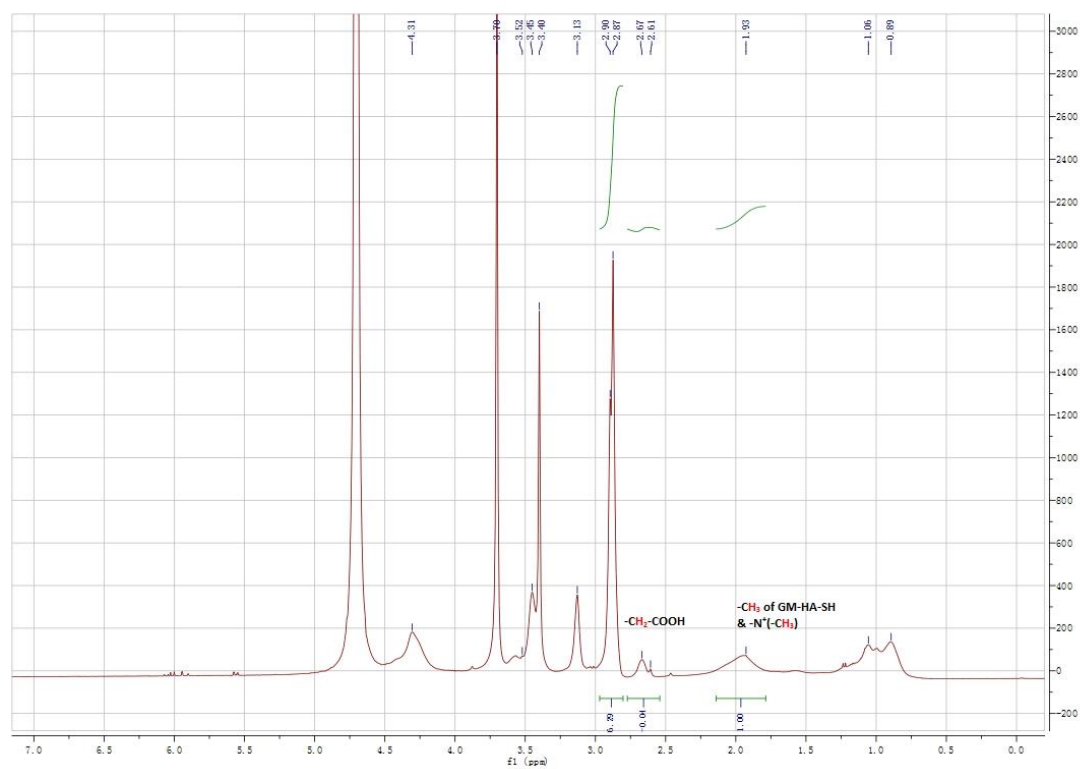

**Figure S4**  $^1\text{H}$  NMR spectrum of aminated FA.

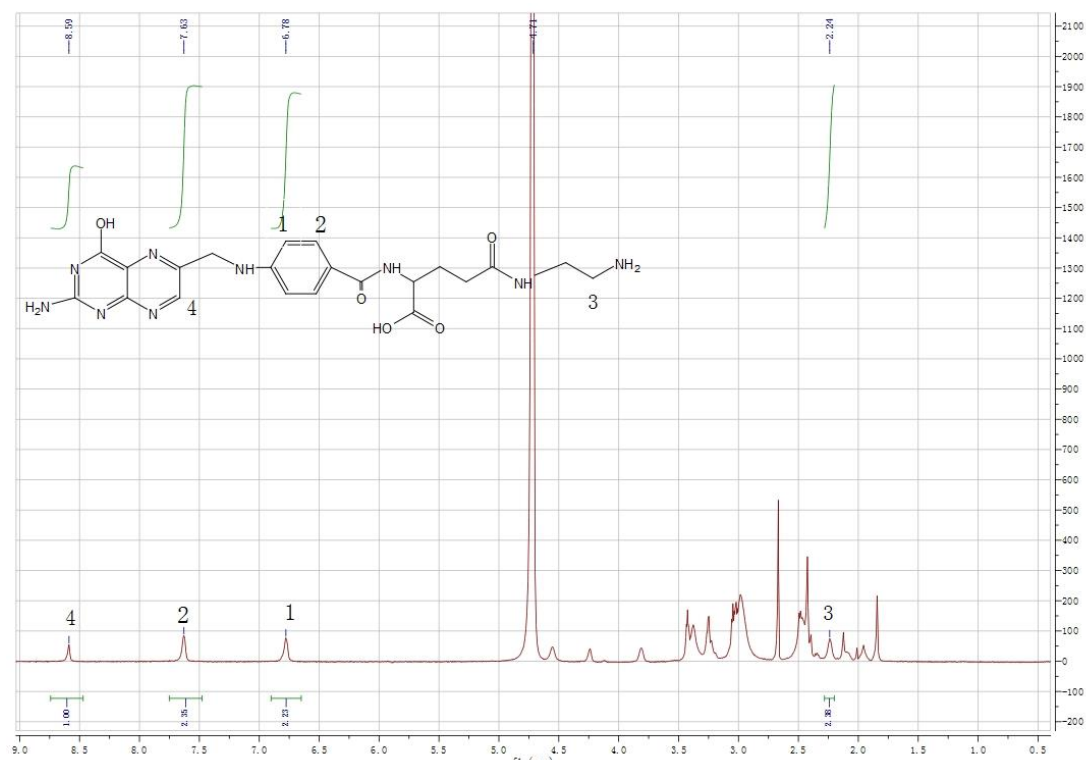

**Figure S5** UV-Vis spectra of FA-Z-NCs and Z-NCs. \*The inset showed the absorbance spectrum of the aminated FA aqueous solution.

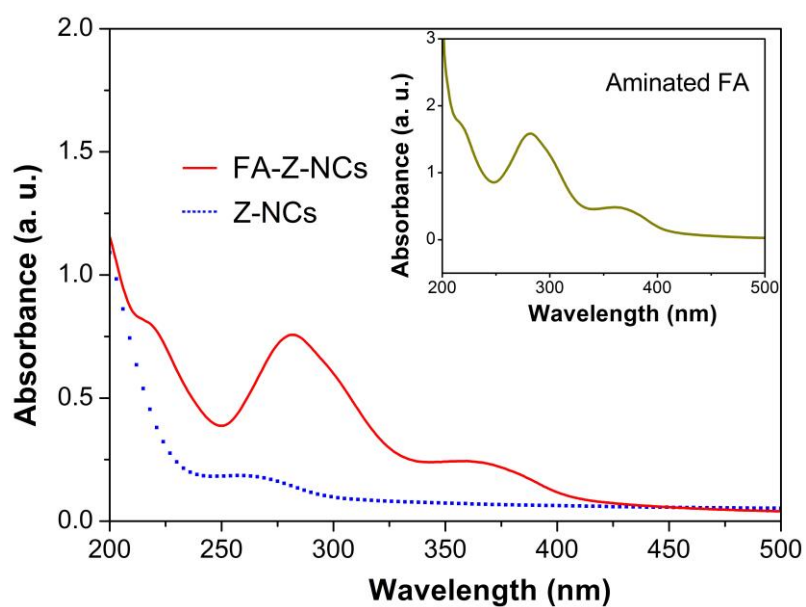

**Figure S6** Size distributions of the (a) DOX/FA-Z-NCs and (b) DOX/Z-NCs.

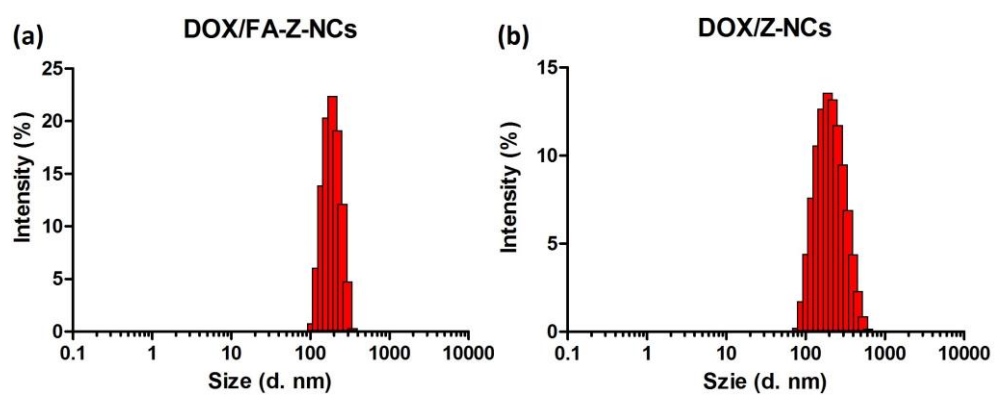

**Figure S7** TEM images of DOX/FA-Z-NCs (left column) and DOX/Z-NCs (right column) after incubation in 10 mM GSH buffer for varied times: (a) (b) 0 min, (c) (d) 12 h and (e) (f) 24 h.

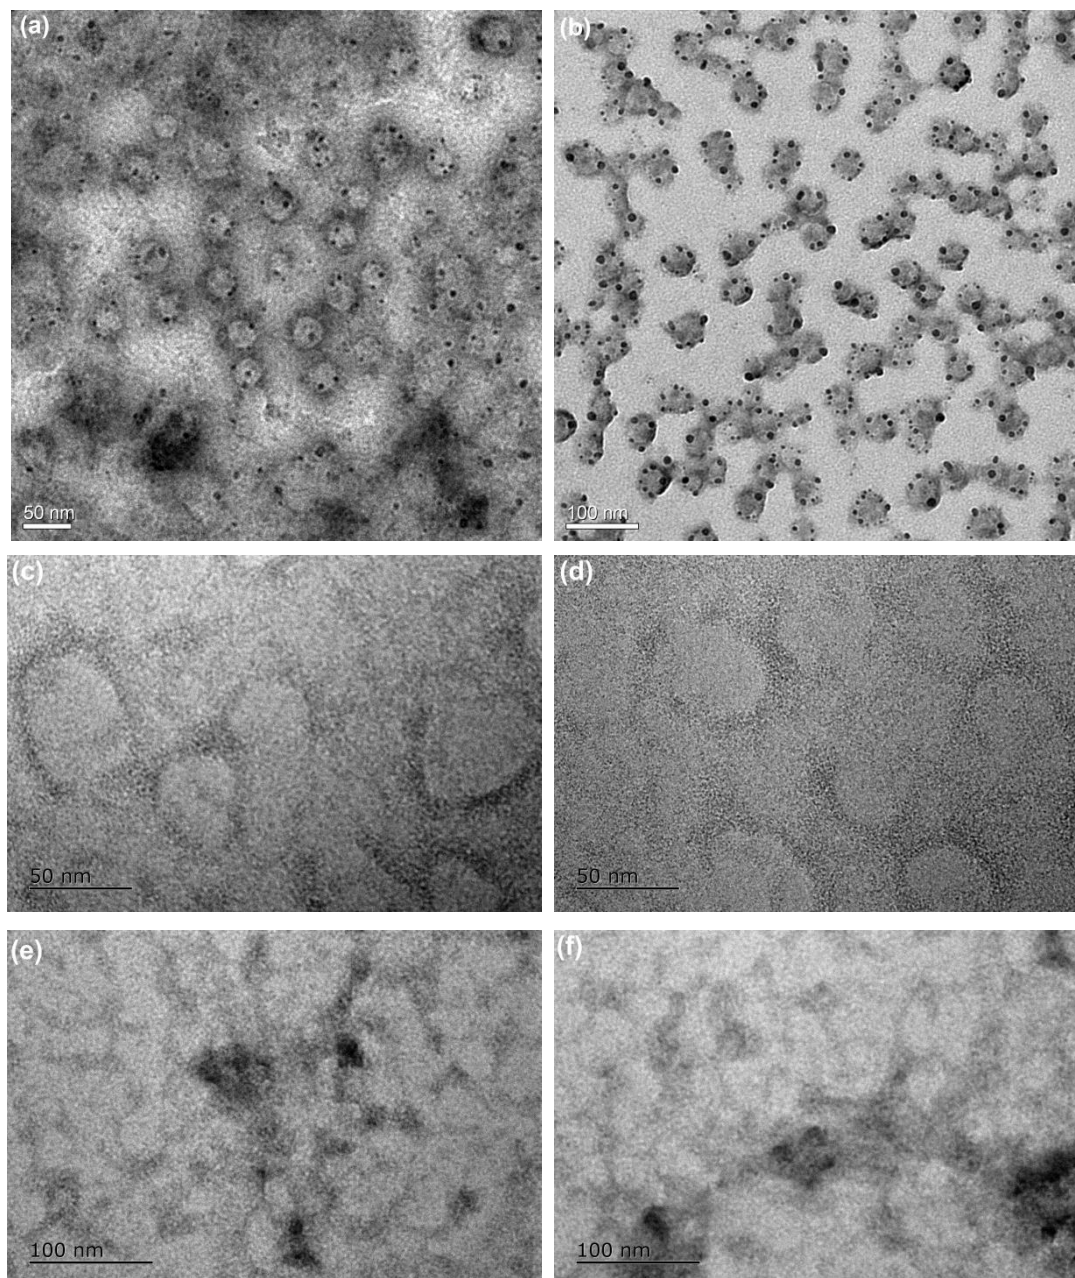

**Figure S8** In vitro cytotoxicity assay. \*4T1 cells were incubated with hollow nanocapsules (a) FA-Z-NCs and (b) Z-NC for 36 h. Concentrations of the hollow nanocapsules were referred to the concentrations of corresponding drug-encapsulating nanocapsules used for cell viability assay.

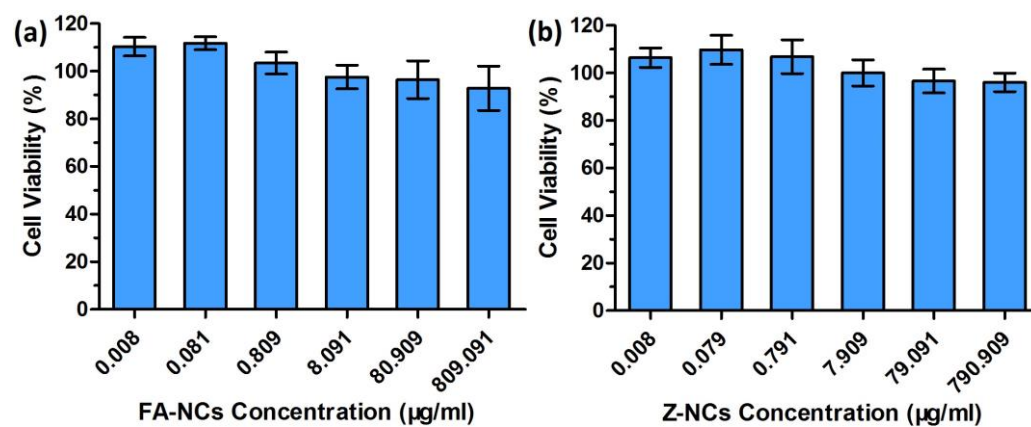

Supplement: Supplementary file 1 [file get_supplementary_file.php]
